# Supplementary material for: JAK-STAT pathway activation compromises nephrocyte function in a Drosophila high-fat diet model of chronic kidney disease
Source: eLife. 2025 Dec 31;13:RP96987. doi: 10.7554/eLife.96987 (PMC12755883; doi:10.7554/eLife.96987)
Supplement: Source data 1. [file elife-96987-data1.xlsx]

## Sheet: Sheet1
Figure 1B
NFD	HFD
0.93878	0.52178
0.75194	0.4586
0.89298	0.48814
1.10884	0.45516
1.1268	0.4621
1.1806	0.63406
Figure 1D
NFD	HFD
0.9902	0.5493
1.1467	0.33166
0.6895	0.50478
1.20448	0.4252
0.9084	0.56098
0.91394	0.78402
Figure 3D
NFD	HFD
0.4411	3.6192
0.7197	1.93292
1.23718	3.47858
0.88758	2.54782
1.36892	3.6644
1.34548	2.11674
Figure 4C
Control	UAS-hop.Tum
1.1365	0.68628
1.00526	0.61024
0.8462	0.63186
1.04694	0.72028
0.98648	0.55984
0.97862	0.5565
Figure 4E
Control	UAS-hop.Tum
1.00732	0.76648
0.96696	0.5926
1.07264	0.96214
0.81844	0.81038
1.05658	0.8687
1.07804	0.72032
Figure 5B
Control	Socs36E-IR
1.11408	0.69506
0.95324	0.7893
0.83512	0.85672
0.95796	0.63214
0.93036	0.65076
1.20926	0.6918
Figure 5D
Control	Socs36E-IR
1.11058	0.54422
0.85194	0.53824
0.85962	0.69134
0.8177	0.43168
1.32864	0.2506
1.03152	0.43026
Figure 5F
Control	upd2-GFP
0.96484	0.72964
0.91704	0.78718
1.0335	0.77214
0.93794	0.75382
1.0362	0.62342
1.11054	0.70866
Figure 6B
	Control						Stat92E-IR
NFD	0.97982	0.88266	0.96178	1.06676	1.00652	1.10244	1.14574	1.1233	0.8556	0.91416	0.93324	0.91172
HFD	0.57512	0.66392	0.85592	0.69782	0.9126	0.7831	1.12316	1.16618	1.264	1.13886	1.12872	1.017
Figure 6D
	Control						Stat92E-IR
NFD	1.05078	0.6982	1.1655	1.04068	0.8409	1.20394	1.06706	1.03524	0.74234	0.85874	0.74514	0.76914
HFD	0.37252	0.52726	0.83278	0.70062	0.47788	0.58842	0.89154	1.1295	0.80654	0.69892	0.61484	0.85018
Figure 7B
	Control						Drug
NFD	1.15402	1.20196	0.80658	1.20666	0.89052	0.74026	1.23462	0.79998	1.27796	0.81128	0.93638	0.74986
HFD	0.3385	0.44378	0.4872	0.34896	0.5828	0.75838	1.27224	1.04278	1.16508	1.16618	1.01676	0.98804
Figure 7D
	Control						Drug
NFD	0.91332	1.0405	1.07802	1.01554	0.8509	1.10166	0.98688	1.03178	1.0962	1.03872	0.91242	0.92148
HFD	0.7659	0.78874	0.69908	0.74408	0.64636	0.64374	1.04992	0.89316	0.77714	1.05578	1.00876	0.96552
Figure 1 - figure supplement 1B
NFD	HFD
1.3278	1.6942
1.1335	3.727
0.8509	2.1826
1.0788	3.6118
0.7637	3.9265
0.8453	2.3773
Figure 1 - figure supplement 2B
NFD	HFD
0.0479059	0.233747
0.181514	0.586889
0.167191	0.650458
0.210627	0.271724
0.0779424	0.578065
0.0823392	0.218231
0.0292365	0.658644
0.0610752	0.536758
0.0733953	0.392907
0.188209	0.214868
0.148077	0.73431
0.172152	0.176536
Figure 6 - figure supplement 1B
	Control						Stat92E-IR
NFD	0.855212	1.14859	0.872632	1.30261	0.975995	0.844966	0.818581	1.00296	0.868341	1.05112	0.968886	0.811088
HFD	0.854943	0.845827	0.5715	0.637019	0.631307	0.702321	1.0089	1.0802	0.797979	0.961642	0.868623	0.862656
Figure 6 - figure supplement 2B
	Control										Stat92E-IR
NFD	0.07	0.26	0.12	0.04	0.12	0.03	0.06	0.04	0.02	0.03	0.21	0.27	0.11	0.13	0.14	0.18	0.14	0.03	0.03	0.14
HFD	0.23	0.59	0.65	0.27	0.58	0.22	0.66	0.54	0.39	0.18	0.18	0.25	0.16	0.08	0.09	0.12	0.2	0.17	0.19	0.21
Figure 7 - figure supplement 1B
Control	Methotrexate
1.24268	0.83386
1.07456	0.6132
0.89698	0.55952
0.62398	0.66792
1.16418	0.70248
0.99762	0.68084
Figure 7 - figure supplement 2B
	Control												Methotrexate
NFD	0.05	0.17	0.17	0.21	0.08	0.08	0.03	0.06	0.07	0.19	0.15	0.17	0.19	0.12	0.07	0.19	0.14	0.15	0.23	0.08	0.07	0.15	0.1	0.13
HFD	0.3	0.12	0.27	0.25	0.23	0.59	0.65	0.27	0.58	0.22	0.66	0.54	0.16	0.29	0.12	0.24	0.04	0.07	0.04	0.05	0.04	0.04	0.11	0.16
